# Supplementary material for: The synergistic mechanism of NOx and chlorobenzene degradation in municipal solid waste incinerators
Source: Royal Society of Chemistry journal article supplement (doi:10.1039/c9cy01157a), 2019-01-01
Supplement: c9cy01157a1.pdf [file c9cy01157a1.pdf]

1

*Supporting Information*

2

**The synergetic mechanism of NO<sub>x</sub> and chlorobenzene**

3

**degradation in municipal solid waste incinerators**

4

5 Lina Gan<sup>a</sup>, Yun Wang<sup>a</sup>, Jianjun Chen<sup>a</sup>, Tao Yan<sup>a</sup>, Yue Peng<sup>a\*</sup>, Junhua Li<sup>a</sup> and John

6

Crittenden<sup>b</sup>

7

*<sup>a</sup>State Key Joint Laboratory of Environment Simulation and Pollution Control,*

8

*National Engineering Laboratory for Multi Flue Gas Pollution Control Technology*

9

*and Equipment, School of Environment, Tsinghua University, Beijing, 100084, China*

10

*<sup>b</sup>Brook Byers Institute for Sustainable Systems, School of Civil and Environmental*

11

*Engineering, Georgia Institute of Technology, Atlanta, Georgia, 30332, United States*

12

13

14 \*Corresponding author: pengyue83@tsinghua.edu.cn

15 Tel.: +86 10 62771093, fax: +86 10 62771093

16 **SI figure captions**

17 Figure S1. The effect of CB on N<sub>2</sub> selectivity and the effect of SCR gas on CO<sub>2</sub>  
18 selectivity for 10-h test at 300 °C. Reaction conditions: NO 500 ppm (when used), CB  
19 50 ppm (when used), NH<sub>3</sub> 500 ppm (when used), O<sub>2</sub> 10 vol.%, N<sub>2</sub> as the balance gas,  
20 GHSV 60,000 mL/(g·h).

21 Figure S2. The NO<sub>x</sub> conversion of CB-SCR of MnO<sub>x</sub>-CeO<sub>2</sub> catalyst at 300 °C.  
22 Reaction conditions: NO 500 ppm, CB 50 ppm (when used), NH<sub>3</sub> 500 ppm (when used),  
23 O<sub>2</sub> 10 vol.%, N<sub>2</sub> as the balance gas, GHSV 60,000 mL/(g·h).

24 Figure S3. The concentrations of CB, CO, CO<sub>2</sub>, and N<sub>2</sub>O, NO, NO<sub>2</sub> during the SCR-  
25 transient reaction with CB at 300 °C. Reaction conditions: NO 500 ppm, CB 50 ppm,  
26 NH<sub>3</sub> 500 ppm, O<sub>2</sub> 10 vol.%, N<sub>2</sub> as the balance gas, GHSV 60,000 mL/(g·h).

27 Figure S4. The concentrations of N<sub>2</sub>O, NO, NO<sub>2</sub> and CB, CO<sub>2</sub> during the SCR reactions  
28 without/with CB and CB oxidation reactions with/without SCR flue gas at 300 °C.  
29 Reaction conditions: NO 500 ppm (when used), CB 50 ppm (when used), NH<sub>3</sub> 500 ppm  
30 (when used), O<sub>2</sub> 10 vol.%, N<sub>2</sub> as the balance gas, GHSV 60,000 mL/(g·h).

31 Figure S5. XPS spectra: (a) Mn 2p, and (b) Ce 3d of the fresh and used catalysts.

32

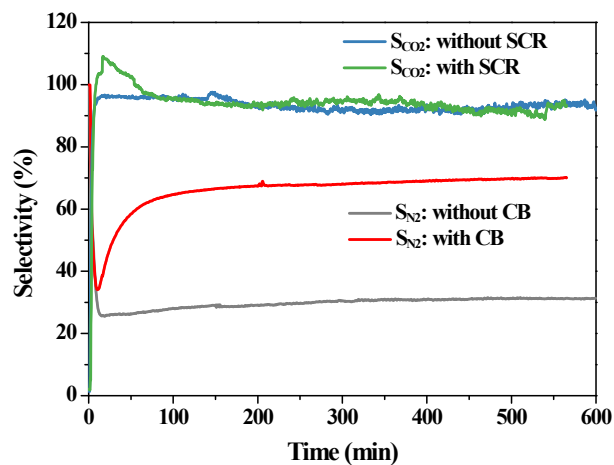

33

34 Figure S1. The effect of CB on  $N_2$  selectivity and the effect of SCR gas on  $CO_2$   
 35 selectivity for 10-h test at 300 °C. Reaction conditions: NO 500 ppm (when used),  
 36 CB 50 ppm (when used),  $NH_3$  500 ppm (when used),  $O_2$  10 vol.%,  $N_2$  as the balance  
 37 gas, GHSV 60,000 mL/(g·h).

38

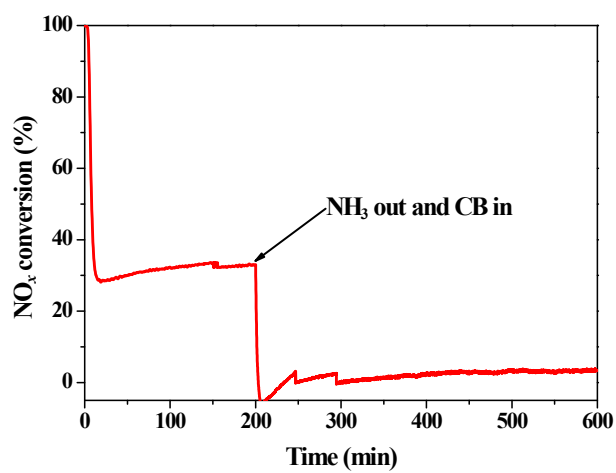

39

40 Figure S2. The NO<sub>x</sub> conversion of CB-SCR of MnO<sub>x</sub>-CeO<sub>2</sub> catalyst at 300 °C.

41 Reaction conditions: NO 500 ppm, CB 50 ppm (when used), NH<sub>3</sub> 500 ppm (when

42 used), O<sub>2</sub> 10 vol.%, N<sub>2</sub> as the balance gas, GHSV 60,000 mL/(g·h).

43

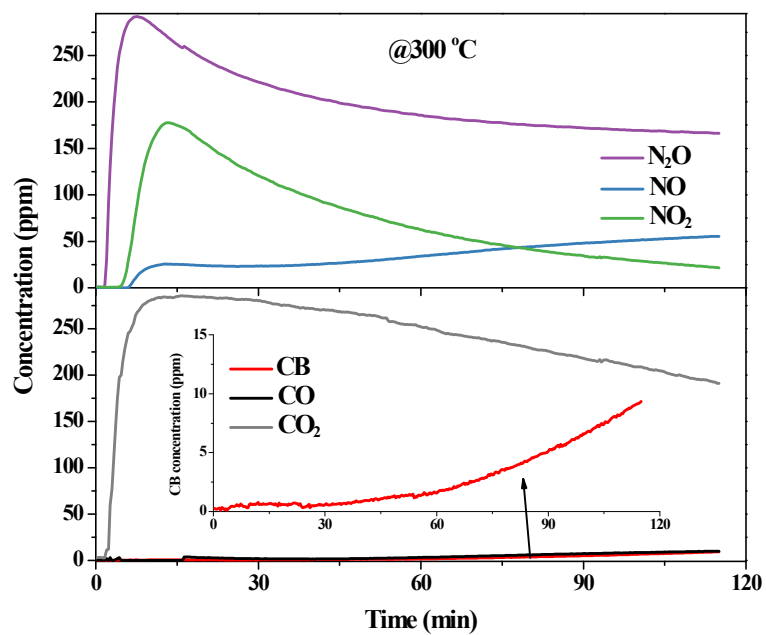

44

45 Figure S3. The concentrations of CB, CO, CO<sub>2</sub>, and N<sub>2</sub>O, NO, NO<sub>2</sub> during the SCR-  
 46 transient reaction with CB at 300 °C. Reaction conditions: NO 500 ppm, CB 50 ppm,  
 47 NH<sub>3</sub> 500 ppm, O<sub>2</sub> 10 vol.%, N<sub>2</sub> as the balance gas, GHSV 60,000 mL/(g·h).

48

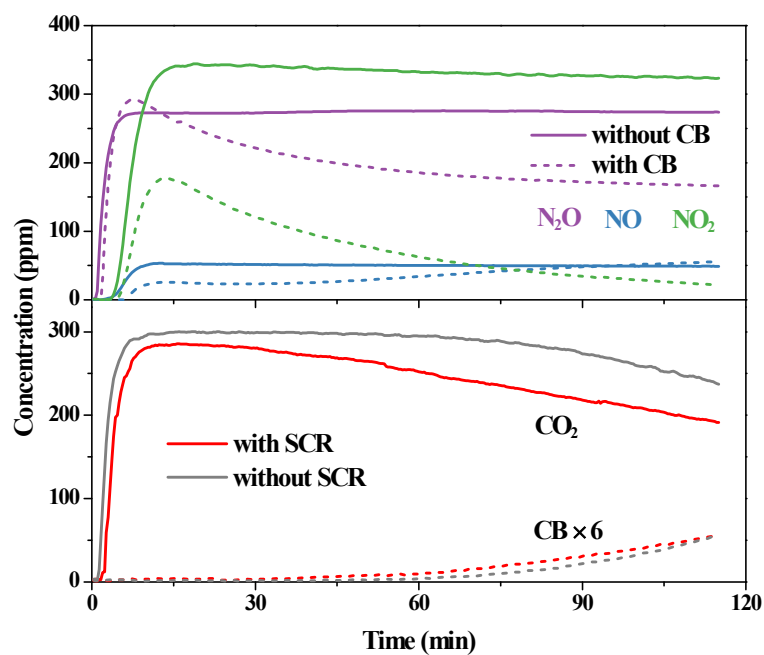

49

50 Figure S4. The concentrations of  $N_2O$ ,  $NO$ ,  $NO_2$  and  $CB$ ,  $CO_2$  during the SCR  
 51 reactions without/with  $CB$  and  $CB$  oxidation reactions with/without SCR flue gas at  
 52  $300\text{ }^\circ\text{C}$ . Reaction conditions:  $NO$  500 ppm (when used),  $CB$  50 ppm (when used),  
 53  $NH_3$  500 ppm (when used),  $O_2$  10 vol.%,  $N_2$  as the balance gas, GHSV 60,000  
 54 mL/(g·h).

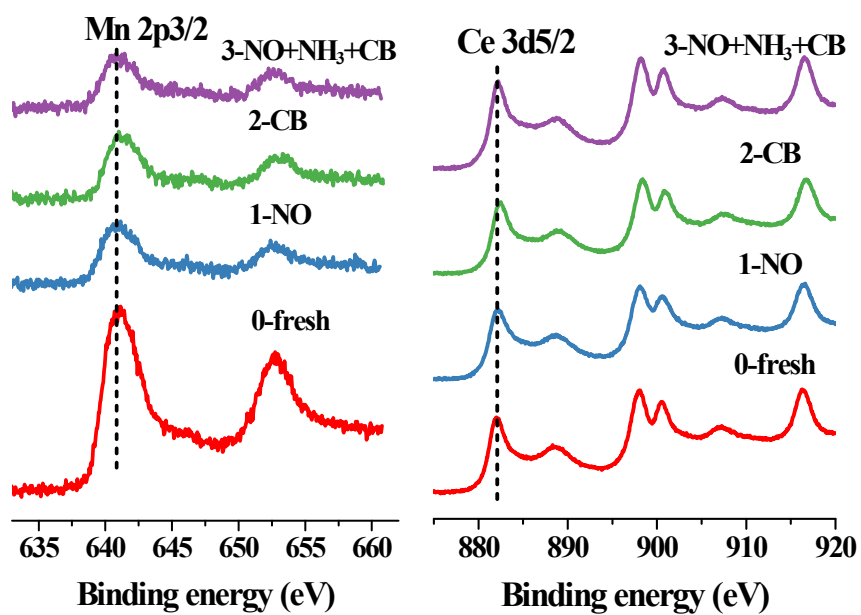

56

57 Figure S5. XPS spectra: (a) Mn 2p, and (b) Ce 3d of the fresh and used catalysts.

58

59
